# Supplementary material
Source: Elsevier journal article supplement (https://discovery-pp.ucl.ac.uk/10051346/7/mmc1.pdf)
Supplement: mmc1 [file mmc1.pdf]

## 6. Supplementary

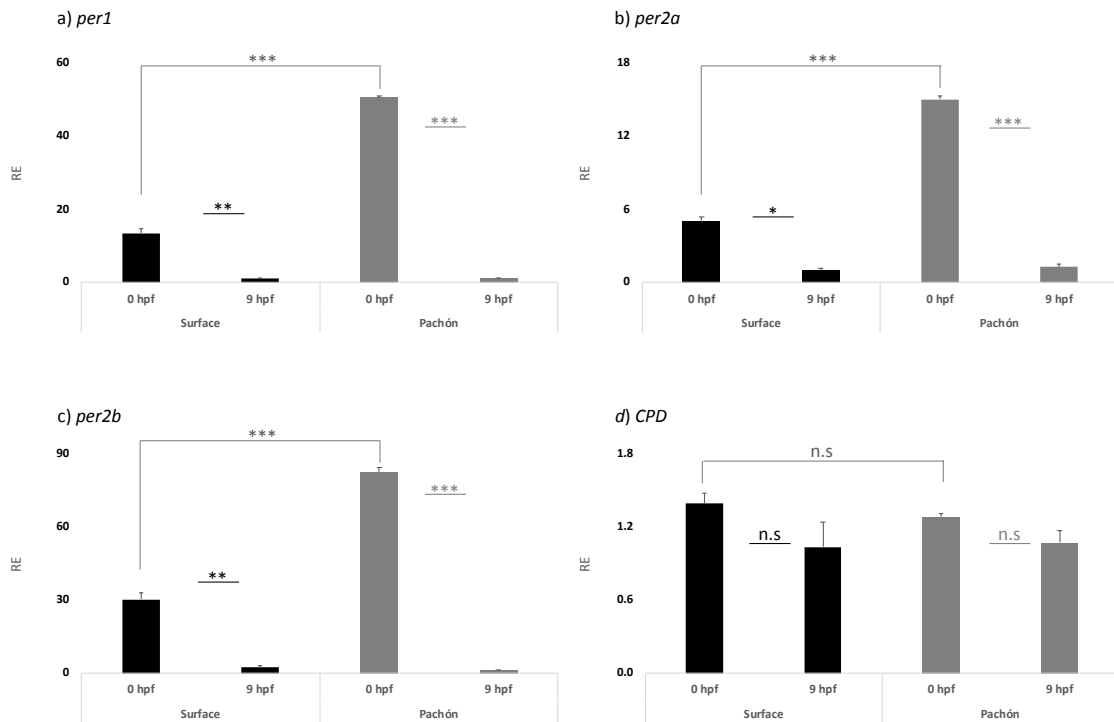

### Supplementary 1 Deposits of maternal mRNA in Surface and Pachón embryos

We compared gene expression between Surface and Pachón unfertilized oocytes (0 hpf) to 9 hpf old embryos kept in constant darkness. Expression of *per1*, *per2a*, *per2b* and *CPD* was determined by qPCR and normalised to the reference gene *rpl13α*. Relative expression (RE) was calculated using the  $\Delta\Delta C_t$  method. (a-d) Comparison of gene expression between maternally deposited mRNA at 0 hpf and mRNA at 9 hpf in Surface strain in black and Pachón strain in light grey. Significance between 0 hpf and 9 hpf old embryos in the strain as well as significance between Surface and Pachón 0 hpf, were compared using a Student's t-test (unpaired, two tailed)

\*,  $p < 0.05$ ; \*\*,  $p < 0.01$ ; \*\*\*,  $p < 0.001$ . Data represent the mean  $\pm$  SEM for between 3 oocyte/embryo samples.
